# Supplementary material
Source: PubMed Central journal article supplement (PMC4314221)
Supplement: NIHMS614370-supplement-Supp_figures_and_table.pdf [file NIHMS614370-supplement-Supp_figures_and_table.pdf]

## Supplementary Figure-1

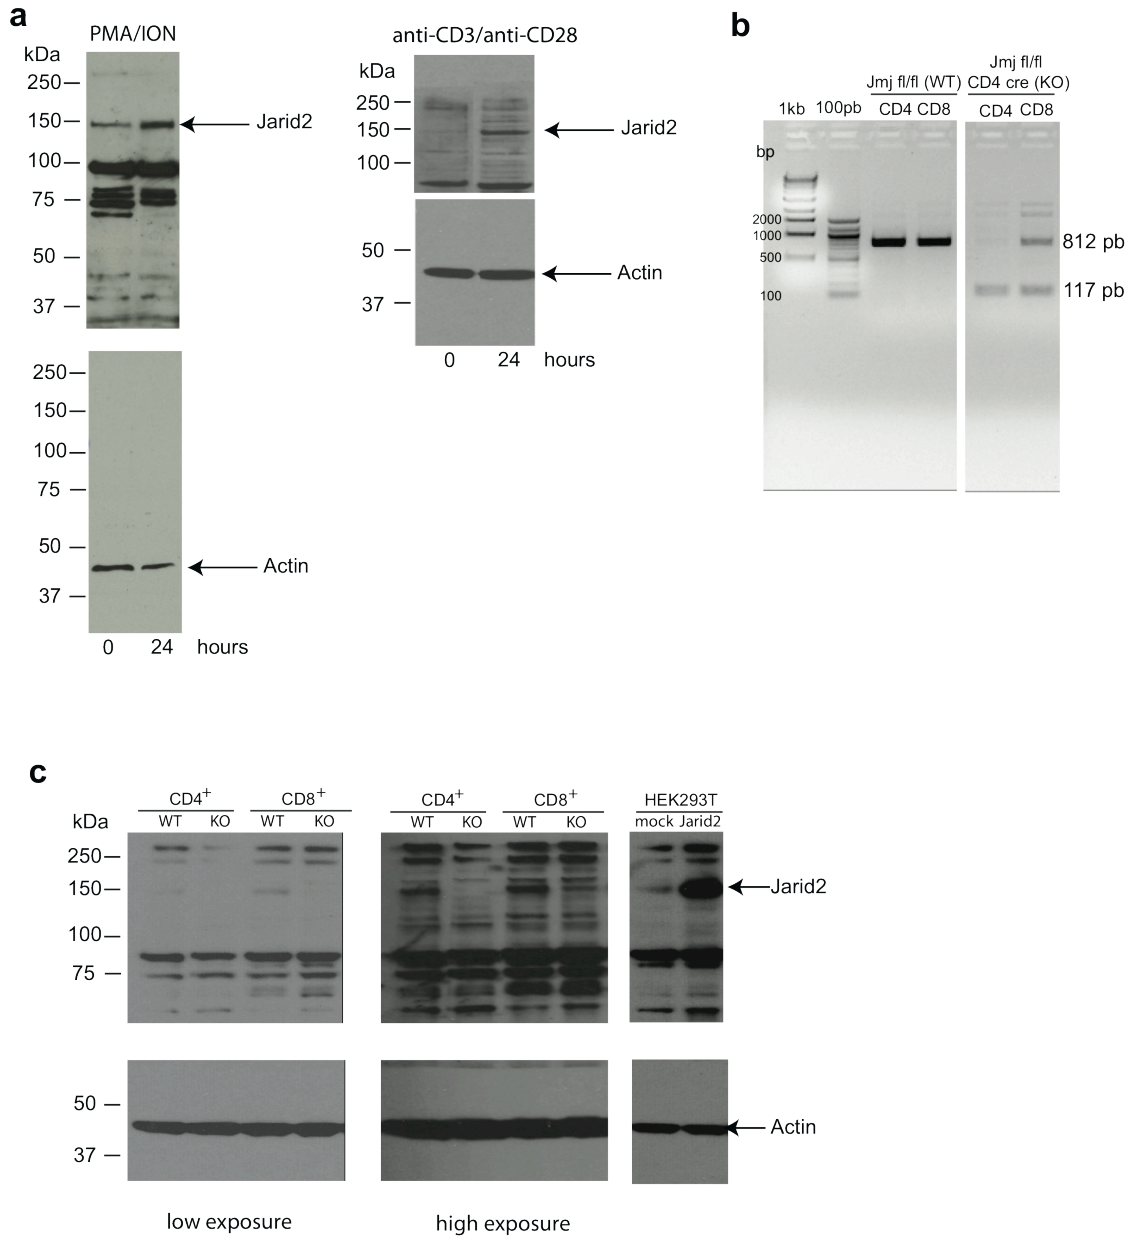

### Supplementary Figure 1- Full blots and gel

a- Full blots from Fig 1b. b- Full gel from Fig. 2a. c- Full blot from Fig.2b

## Supplementary Figure-2

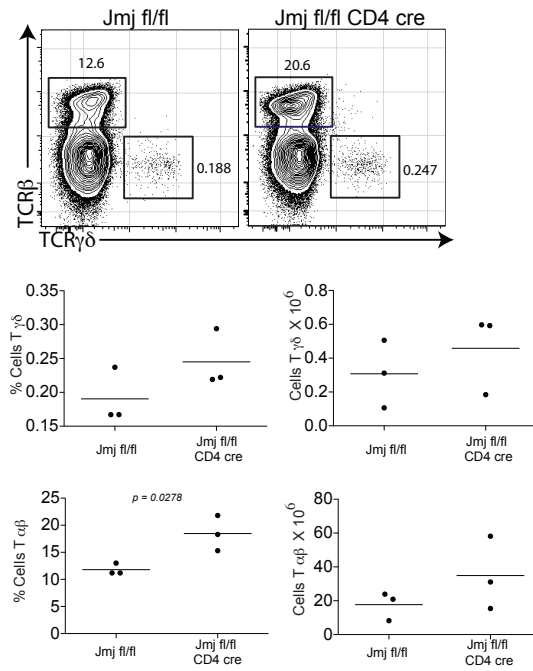

### Supplementary Figure 2- $\gamma\delta$ T cells are not expanded in the thymus of Jmj fl/fl CD4Cre mice

A representative FACS plot depicting the frequencies of TCR $\beta$  and TCR $\gamma\delta$  positive cells in the thymus of *Jmj fl/fl* or *Jmj fl/fl CD4Cre* mice (*top*). The percentages and total numbers of cells in individual mice are graphically depicted (*bottom*).

## Supplementary Table-1

| qPCR                | Forward                  | Reverse                   |
|---------------------|--------------------------|---------------------------|
| Jarid2              | GCGGTAAATGGGCTTCTTGG     | TGCTAGTAGAGGACACTTGGGA    |
| PLZF                | AATGGCTGTGGCAAGAAGTTC    | TGGTGGCAGAGTTTGC ACTCA    |
| Egr2                | CTTCAGCCGAAGTGACCACC     | GCTCTTCCGTTCTTCTGCC       |
| L32                 | CGTCTCAGGCCTTCAGTGAG     | CAAGAGGGAGAGCAAGCCTA      |
| <b>ChIP</b>         |                          |                           |
| <i>Zbtb16</i> +2400 | AAGAAGCATTTCGGCTTTCT     | CTCCTAAGGCCGTCTCAGTG      |
| <i>Zbtb16</i> +1600 | CCCAACTTTGAACAGCCATT     | AGCTCTCTCCACCCTCTTCC      |
| <i>Zbtb16</i> +600  | CACCTCCTGTTTTCTGTCAT     | CCCACCACCTCCTTCTTACA      |
| <i>Zbtb16</i> -200  | GAACTGTTGCTCCGGATCTC     | CGGTGGTGATTTGCTAACCT      |
| <i>Zbtb16</i> -1600 | ATTCCCCAGGAGCTAAAGGA     | TAAGCTCTGCCACCTGGTCT      |
| <i>Hoxd9</i> prom   | CGAGTTCGCCTCGTGTAGTT     | ACACGTACGGGTGGTACAGG      |
| <i>Gapdh</i> prom   | GCGCGAAAGTAAAGAAAGAAGCCC | AGCGGCCCGGAGTCTTAAGTATTAG |

Supplementary Table 1- List of primers used for qPCR
